# Supplementary material for: Health impact of urban green spaces: a systematic review of heat-related morbidity and mortality
Source: PubMed Central journal article supplement — BMJ Open. 2024 Oct 22;14(9):e081632. doi: 10.1136/bmjopen-2023-081632 (PMC11499757; doi:10.1136/bmjopen-2023-081632), 2024-10-22
Supplement: bmjopen-14-9-s001.pdf [file bmjopen-14-9-s001.pdf]

Supplemental Table S1

| Database       | Key terms related to 'Urban Green Spaces' AND                                                                                                                                                                                                                                                       | Key terms 'Heat-related Morbidity and Mortality'                                                                                                                                                                                                                                  | Combined Keywords                                                                                                                                                                                                                                                                                                                                                                                                                                                                                                                                                                          |
|----------------|-----------------------------------------------------------------------------------------------------------------------------------------------------------------------------------------------------------------------------------------------------------------------------------------------------|-----------------------------------------------------------------------------------------------------------------------------------------------------------------------------------------------------------------------------------------------------------------------------------|--------------------------------------------------------------------------------------------------------------------------------------------------------------------------------------------------------------------------------------------------------------------------------------------------------------------------------------------------------------------------------------------------------------------------------------------------------------------------------------------------------------------------------------------------------------------------------------------|
| Pubmed         | ("Urban Green Space"[Title/Abstract] OR "Urban Greenery"[Title/Abstract] OR "Urban Vegetation"[Title/Abstract] OR "Urban Trees"[Title/Abstract] OR "Urban Parks"[Title/Abstract] OR "Urban Green Zones"[Title/Abstract] OR "Green Roofs"[Title/Abstract] OR "Green Infrastructure"[Title/Abstract]) | ("Heat-related Mortality"[Title/Abstract] OR "Heat-related Morbidity"[Title/Abstract] OR "Heat Stress"[Title/Abstract] OR "Heat Illness"[Title/Abstract] OR "Heat Stroke"[Title/Abstract] OR "Heat Exhaustion"[Title/Abstract] OR "Heat-related Health Outcomes"[Title/Abstract]) | ("Urban Green Space"[Title/Abstract] OR "Urban Greenery"[Title/Abstract] OR "Urban Vegetation"[Title/Abstract] OR "Urban Trees"[Title/Abstract] OR "Urban Parks"[Title/Abstract] OR "Urban Green Zones"[Title/Abstract] OR "Green Roofs"[Title/Abstract] OR "Green Infrastructure"[Title/Abstract]) AND (("Heat-related Mortality"[Title/Abstract] OR "Heat-related Morbidity"[Title/Abstract] OR "Heat Stress"[Title/Abstract] OR "Heat Illness"[Title/Abstract] OR "Heat Stroke"[Title/Abstract] OR "Heat Exhaustion"[Title/Abstract] OR "Heat-related Health Outcomes"[Title/Abstract]) |
| Scopus         | "Urban Green Space" OR "Urban Greenery" OR "Urban Vegetation" OR "Urban Trees" OR "Urban Parks" OR "Urban Green Zones" OR "Green Roofs" OR "Green Infrastructure"                                                                                                                                   | "Heat-related Mortality" OR "Heat-related Morbidity" OR "Heat Stress" OR "Heat Illness" OR "Heat Stroke" OR "Heat Exhaustion" OR "Heat-related Health Outcomes"                                                                                                                   | "Urban Green Space" OR "Urban Greenery" OR "Urban Vegetation" OR "Urban Trees" OR "Urban Parks" OR "Urban Green Zones" OR "Green Roofs" OR "Green Infrastructure" AND "Heat-related Mortality" OR "Heat-related Morbidity" OR "Heat Stress" OR "Heat Illness" OR "Heat Stroke" OR "Heat Exhaustion" OR "Heat-related Health Outcomes"                                                                                                                                                                                                                                                      |
| Google Scholar | ("Urban Green Space" OR "Urban Greenery" OR "Urban Vegetation" OR "Urban Trees" OR "Urban Parks" OR "Urban Green Zones" OR                                                                                                                                                                          | ("Heat-related Mortality" OR "Heat-related Morbidity")                                                                                                                                                                                                                            | ("Urban Green Space" OR "Urban Greenery" OR "Urban Vegetation" OR "Urban Trees" OR "Urban Parks" OR "Urban Green Zones" OR                                                                                                                                                                                                                                                                                                                                                                                                                                                                 |

|  |                                          |  |                                                                                                     |
|--|------------------------------------------|--|-----------------------------------------------------------------------------------------------------|
|  | "Green Roofs" OR "Green Infrastructure") |  | "Green Roofs" OR "Green Infrastructure") AND ("Heat-related Mortality" OR "Heat-related Morbidity") |
|--|------------------------------------------|--|-----------------------------------------------------------------------------------------------------|
